# Supplementary material for: Autophagy Protects the Blood-Brain Barrier Through Regulating the Dynamic of Claudin-5 in Short-Term Starvation
Source: PubMed Central journal article supplement (PMC6345697; doi:10.3389/fphys.2019.00002), 2019-01-18
Supplement: Data_Sheet_1.pdf [file Data_Sheet_1.pdf]

## Supplementary information

### FIGURE LEGENDS

**FIGURE S1 | Akt-mTOR pathway was involved in activation of autophagy induced by serum starvation.** Western blot was used to determine the relative expression of p-Akt, p-mTOR, LC3-II/I and p-p70S6K in bEnd.3 monolayer under starvation for the indicated time. Data are provided as the mean  $\pm$  SEM. \* P < 0.05, \*\* P < 0.01, comparing with the control group.

**FIGURE S2 | Autophagy was activated under starvation and played a protective role in the integrity of endothelial cell barrier formed by hCMEC/D3.** (A) Localization of LC3 and Cldn5 was measured by immunofluorescence staining. Cldn5 aggregated in cytosol and autophagy mediated its clearance (white arrow heads). (B) Autophagy played a role in reducing the paracellular permeability under starvation. 3-MA, 3-methyladenine; Rapa, rapamycin. Data are provided as the mean  $\pm$  SEM. \* P < 0.05, \*\* P < 0.01. Scale bar: 10  $\mu$ m.
